# Supplementary figures and images for: The interplay between asymmetric and symmetric DNA loop extrusion
Source: eLife journal article supplement (doi:10.7554/elife.63528), 2020-12-09

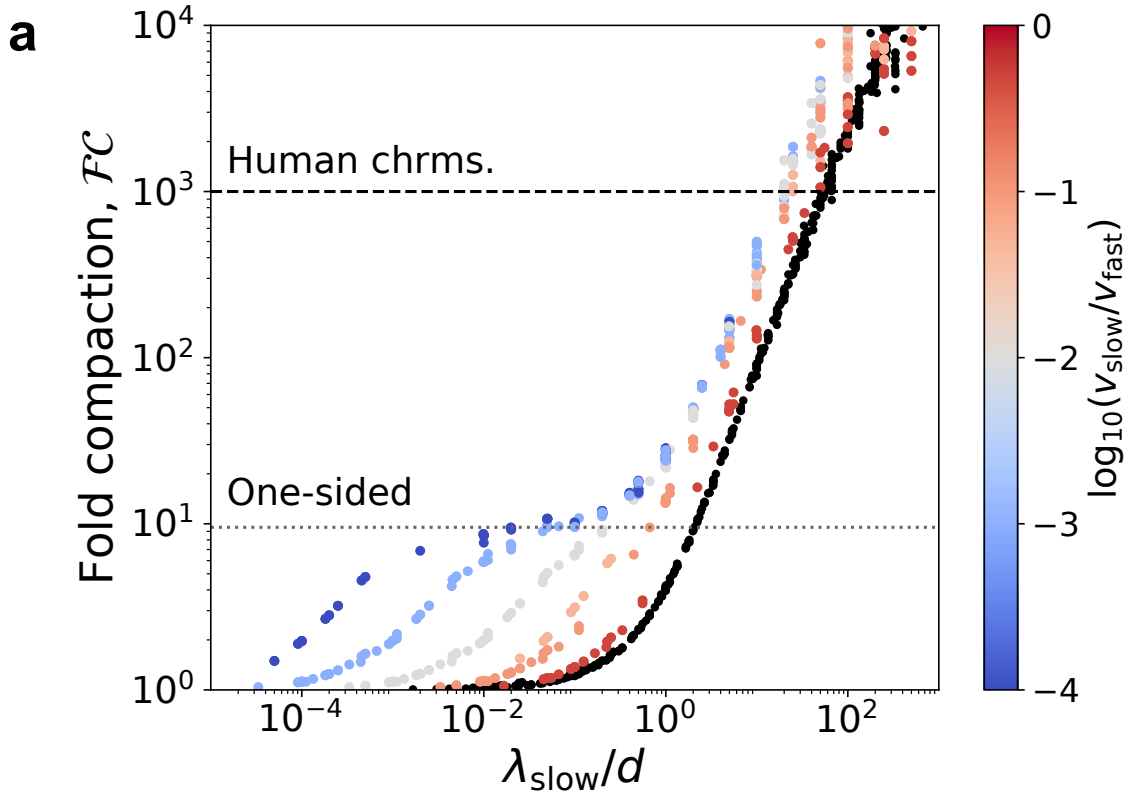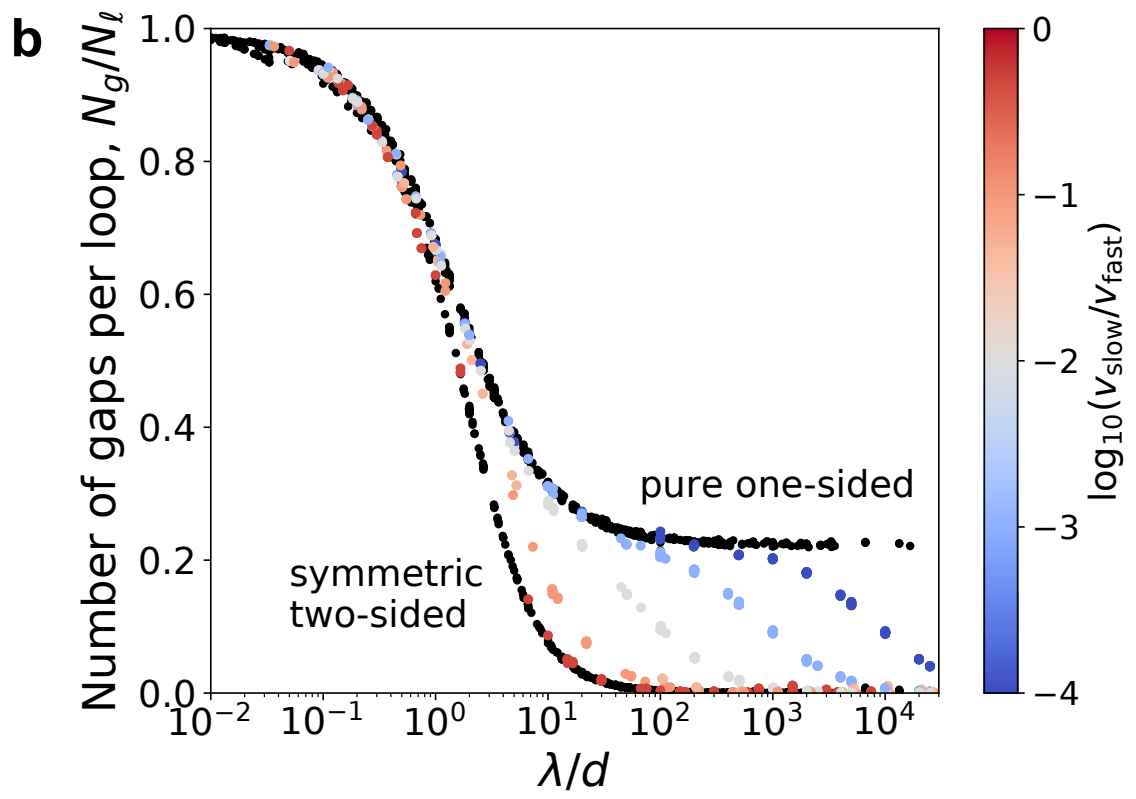

Supplement: supp [file elife_poa_e63528_Figure_1_figure_supplement_1.pdf › elife_poa_e63528_Figure_1_figure_supplement_1.pdf]

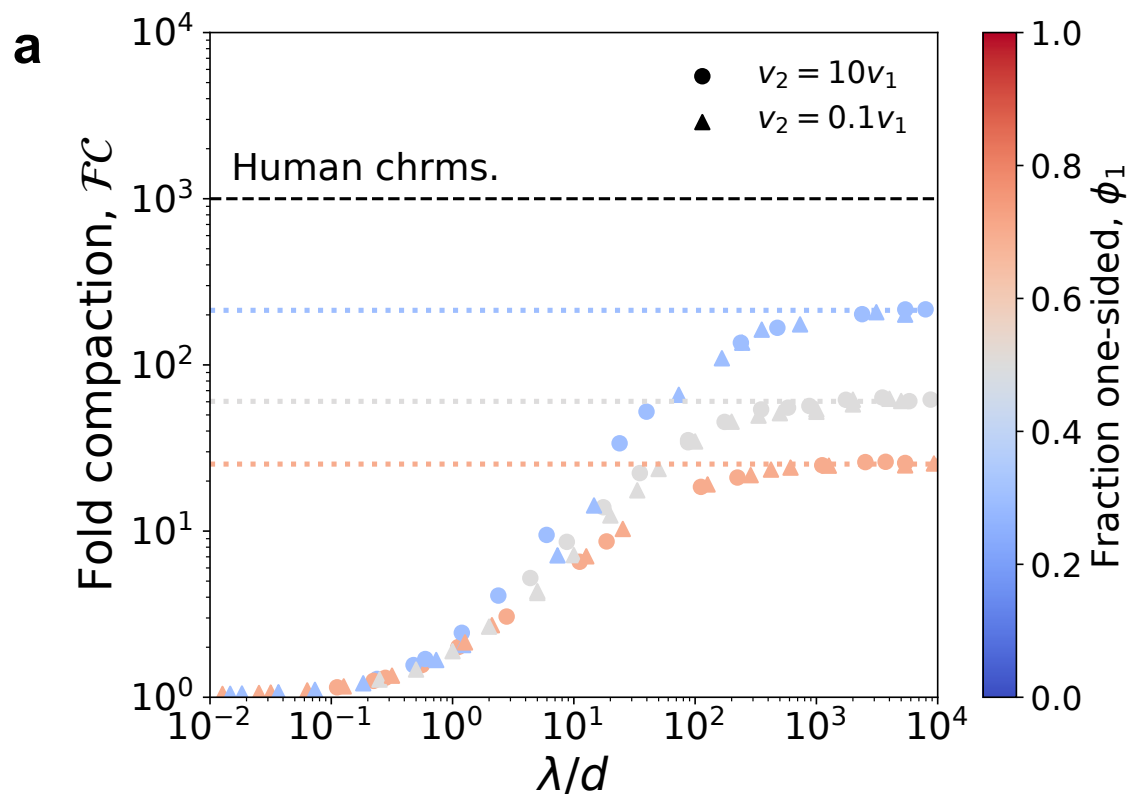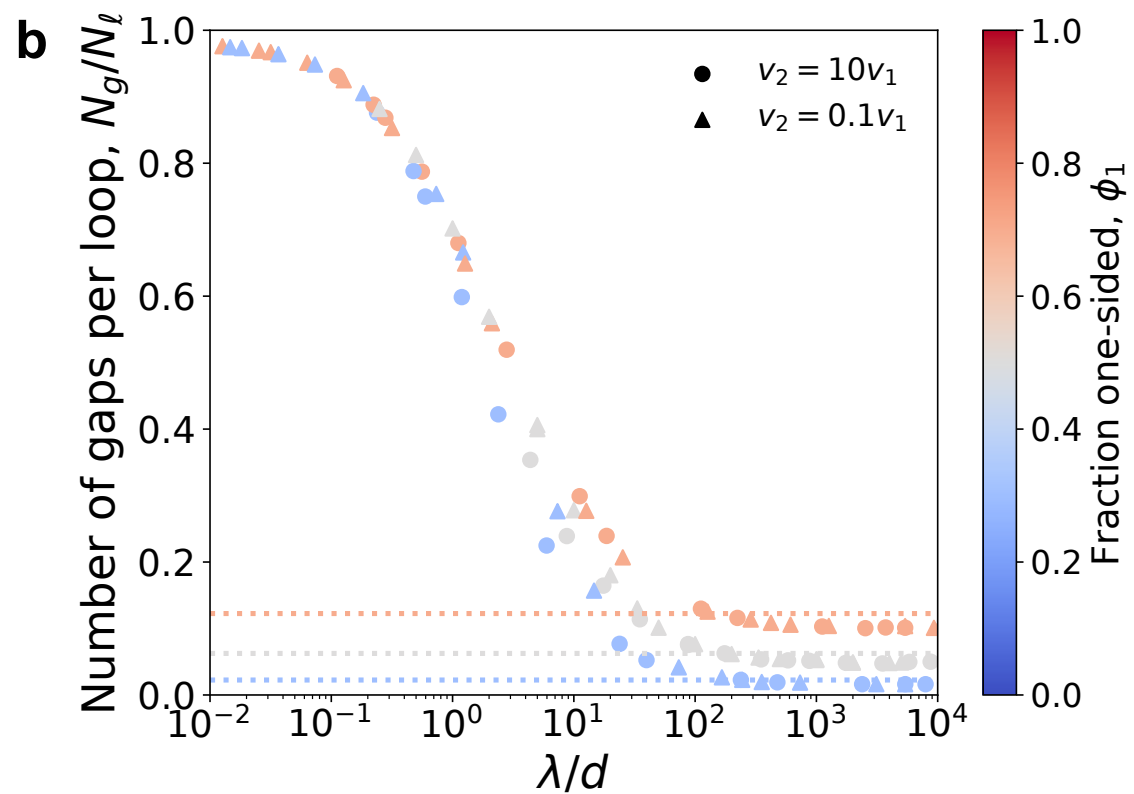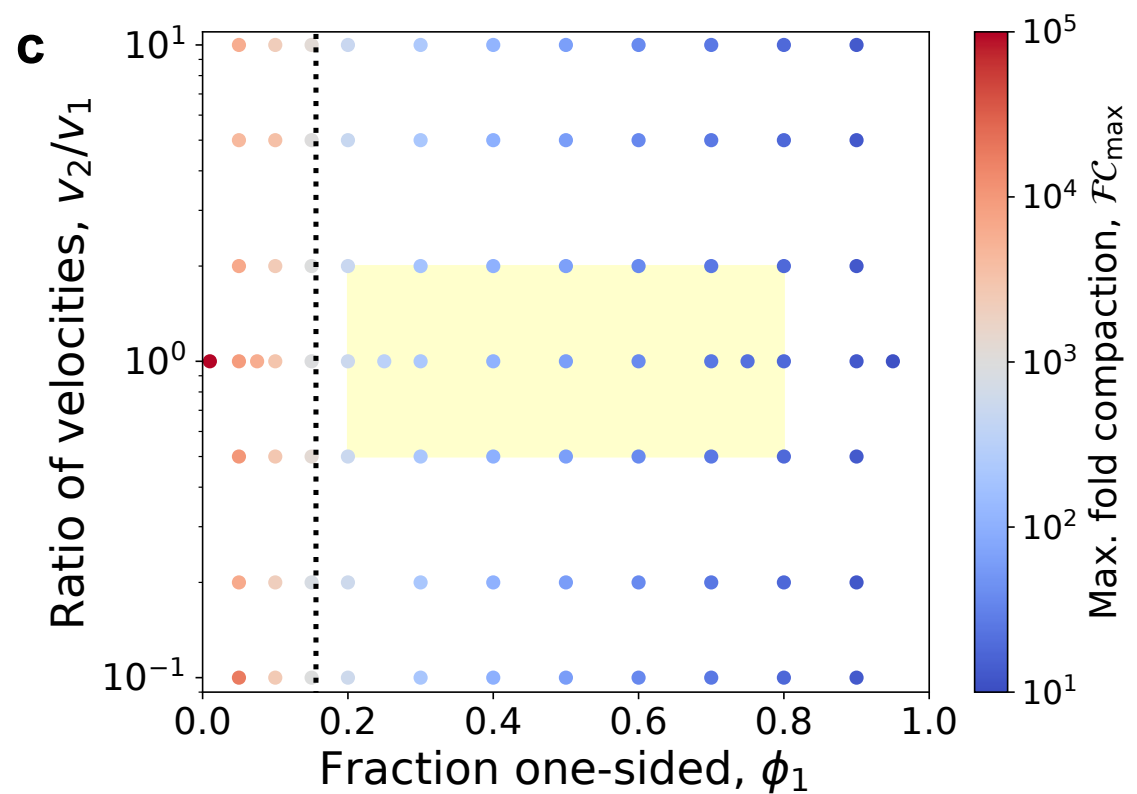

Supplement: supp [file elife_poa_e63528_Figure_2_figure_supplement_1.pdf › elife_poa_e63528_Figure_2_figure_supplement_1.pdf]

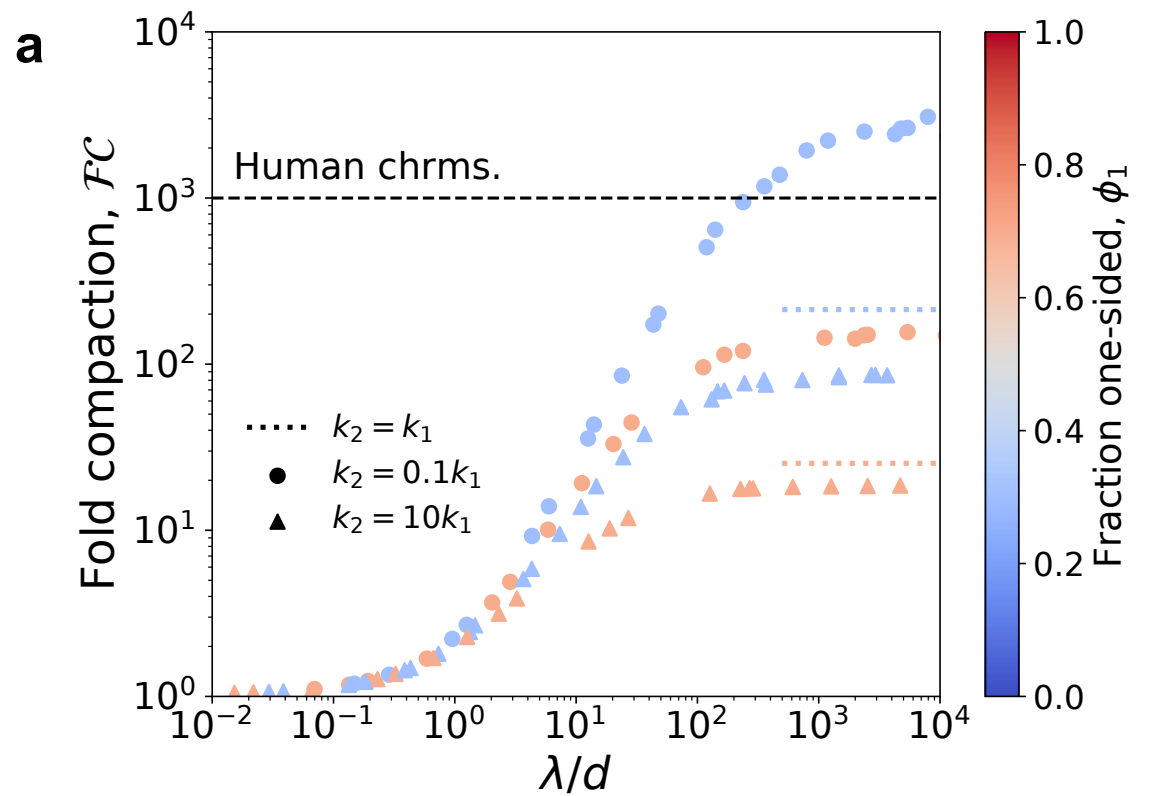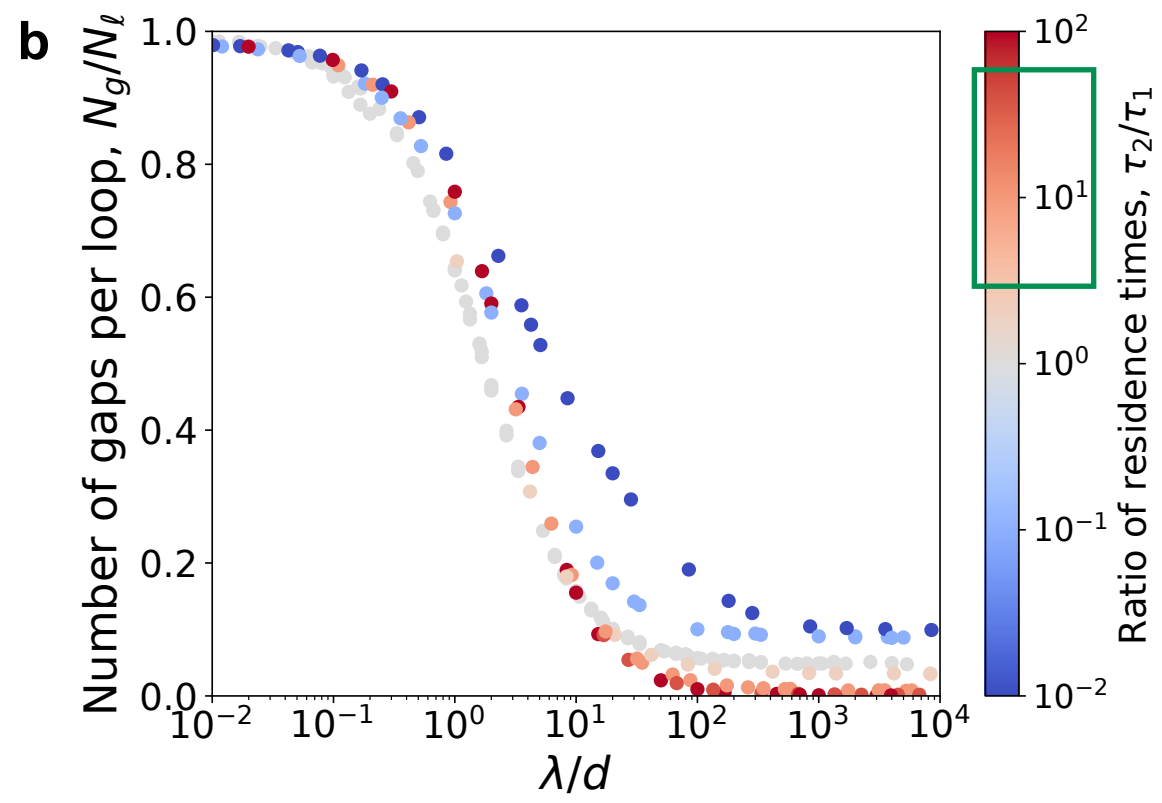

Supplement: supp [file elife_poa_e63528_Figure_2_figure_supplement_2.pdf › elife_poa_e63528_Figure_2_figure_supplement_2.pdf]

Fold compaction,  $\mathcal{FC}$

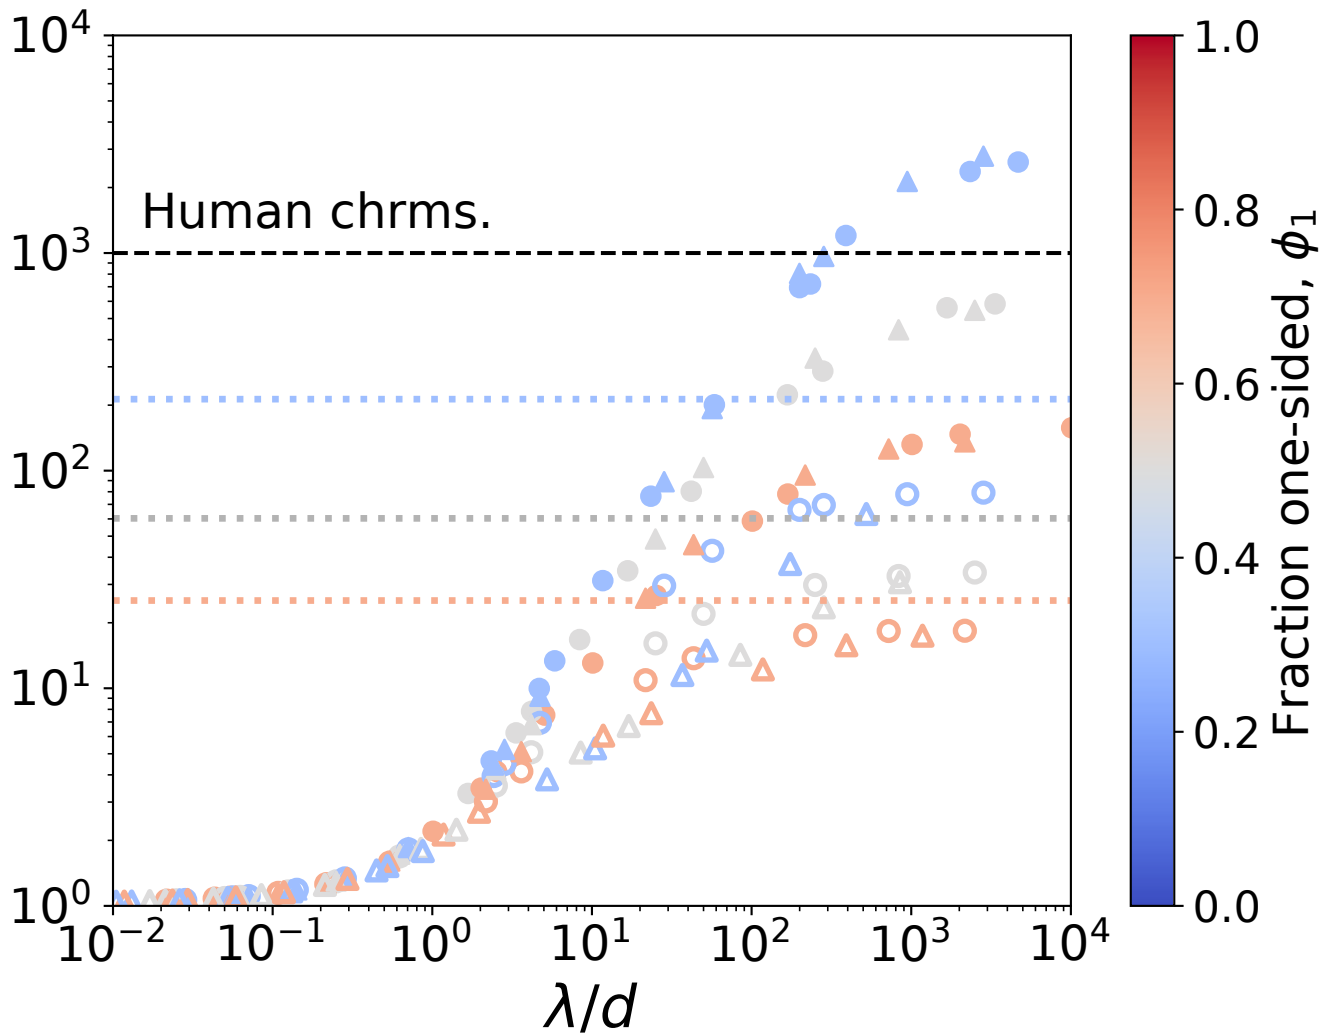

Supplement: supp [file elife_poa_e63528_Figure_2_figure_supplement_3.pdf › elife_poa_e63528_Figure_2_figure_supplement_3.pdf]

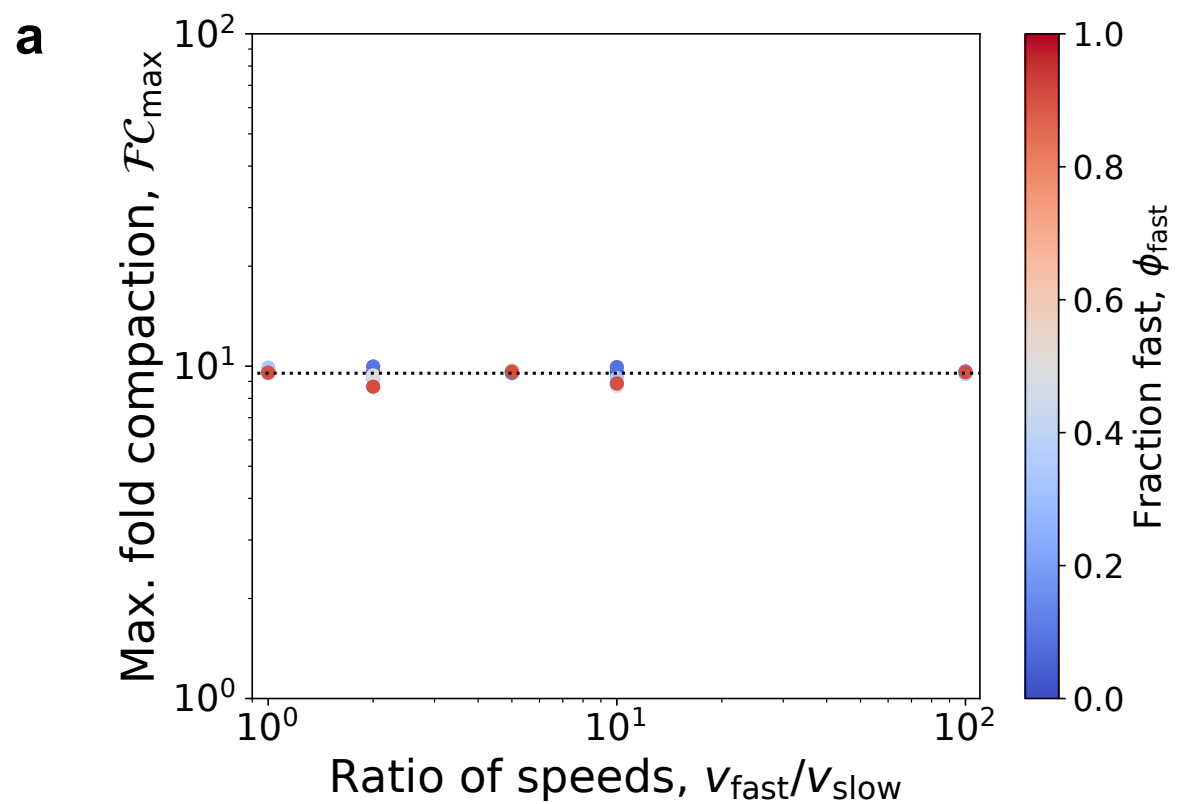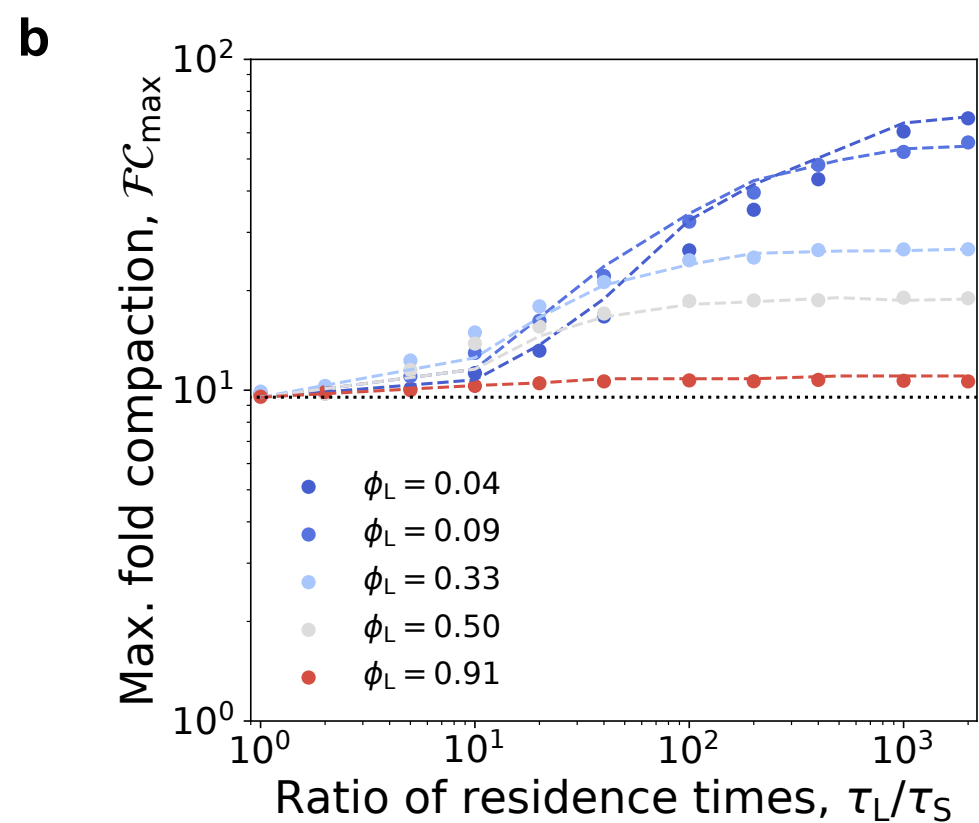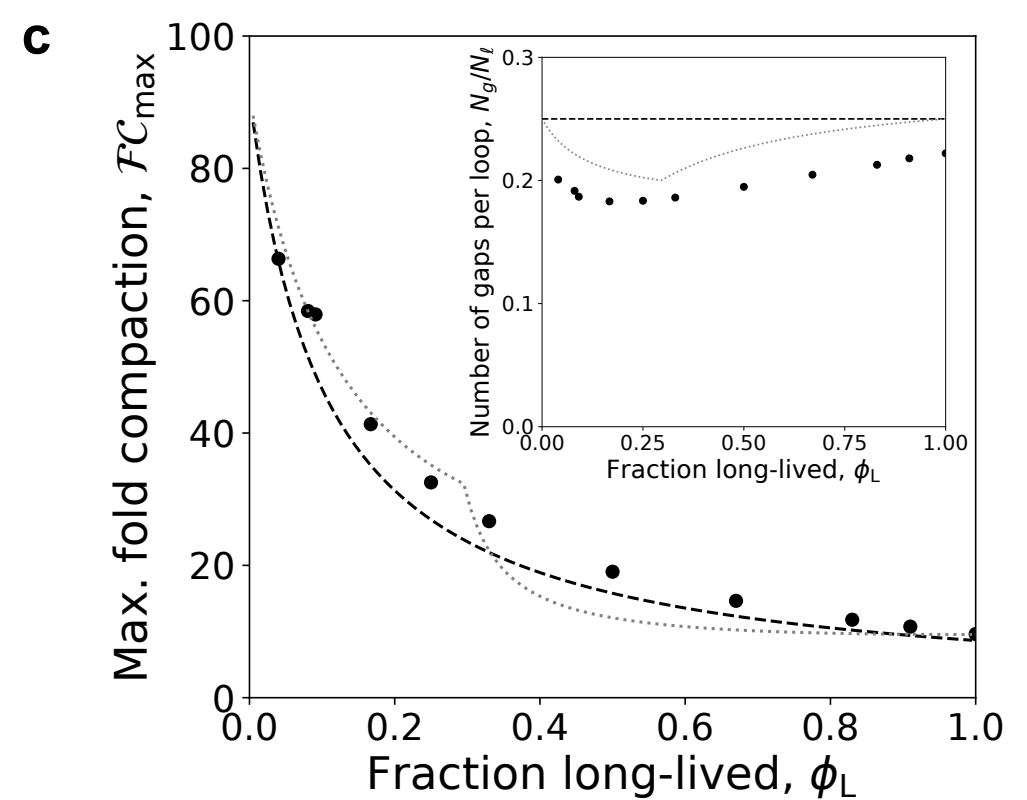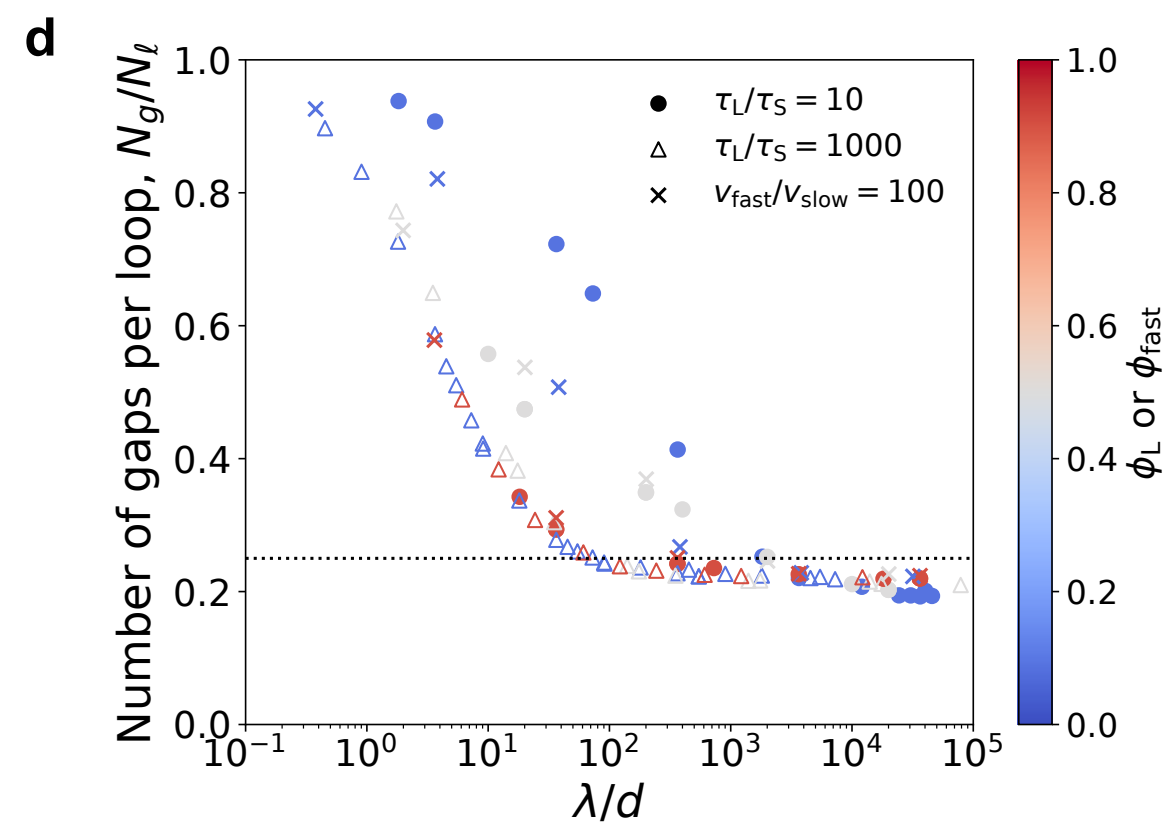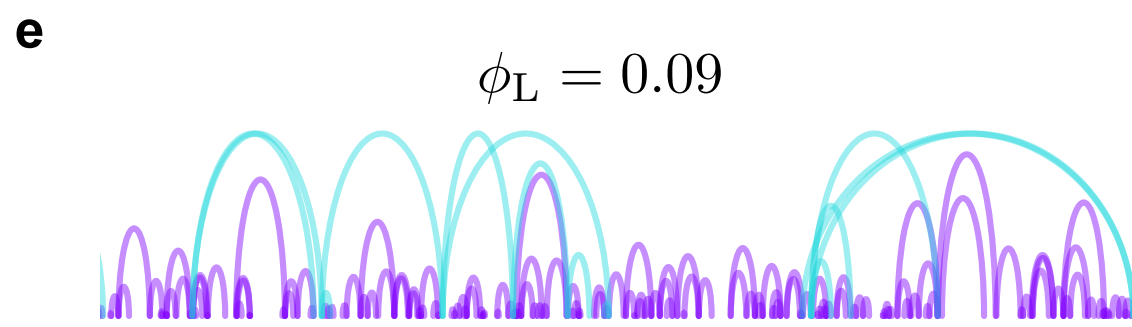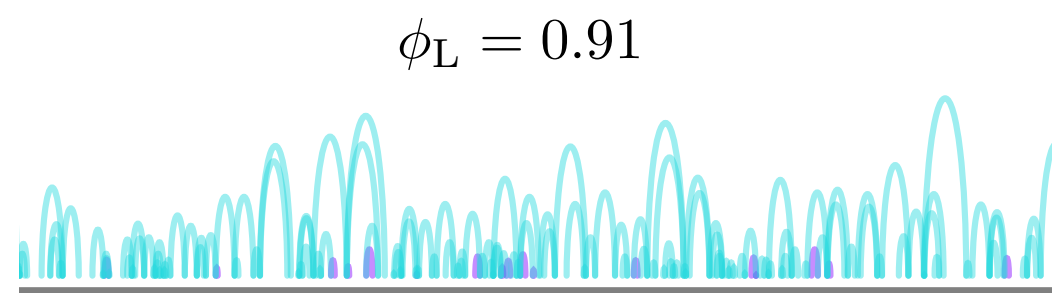

Supplement: supp [file elife_poa_e63528_Figure_2_figure_supplement_4.pdf › elife_poa_e63528_Figure_2_figure_supplement_4.pdf]

CI + CII

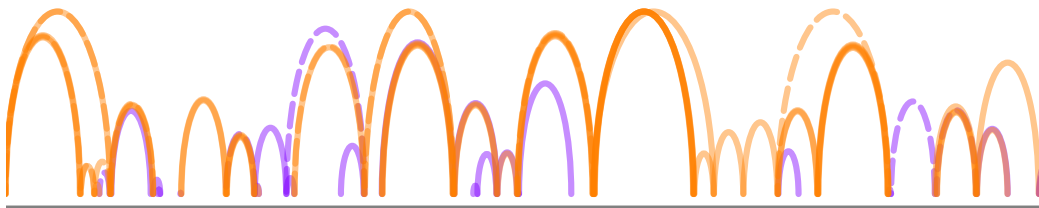

CI + CII + extra-stable CII

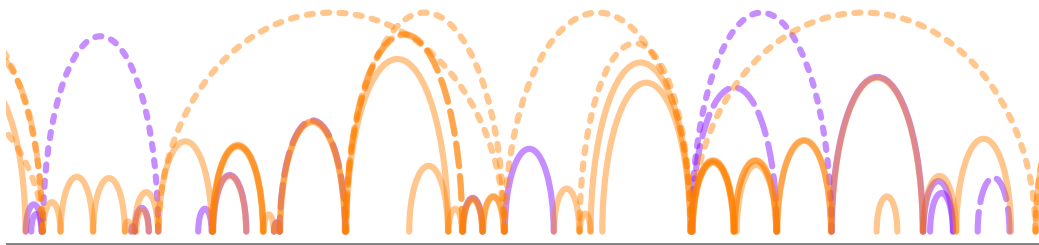

CI + CII + extra-stable two-sided CII

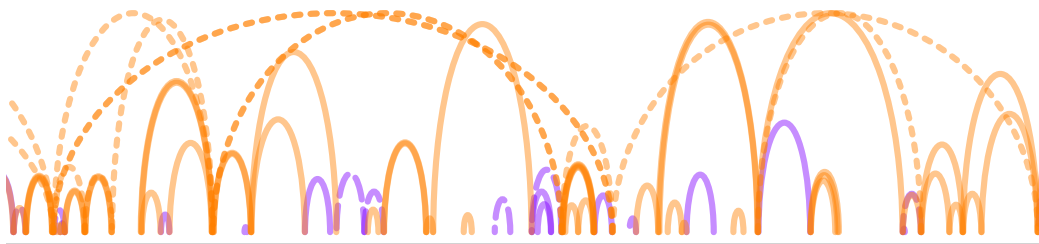

Supplement: supp [file elife_poa_e63528_Figure_3_figure_supplement_1.pdf › elife_poa_e63528_Figure_3_figure_supplement_1.pdf]

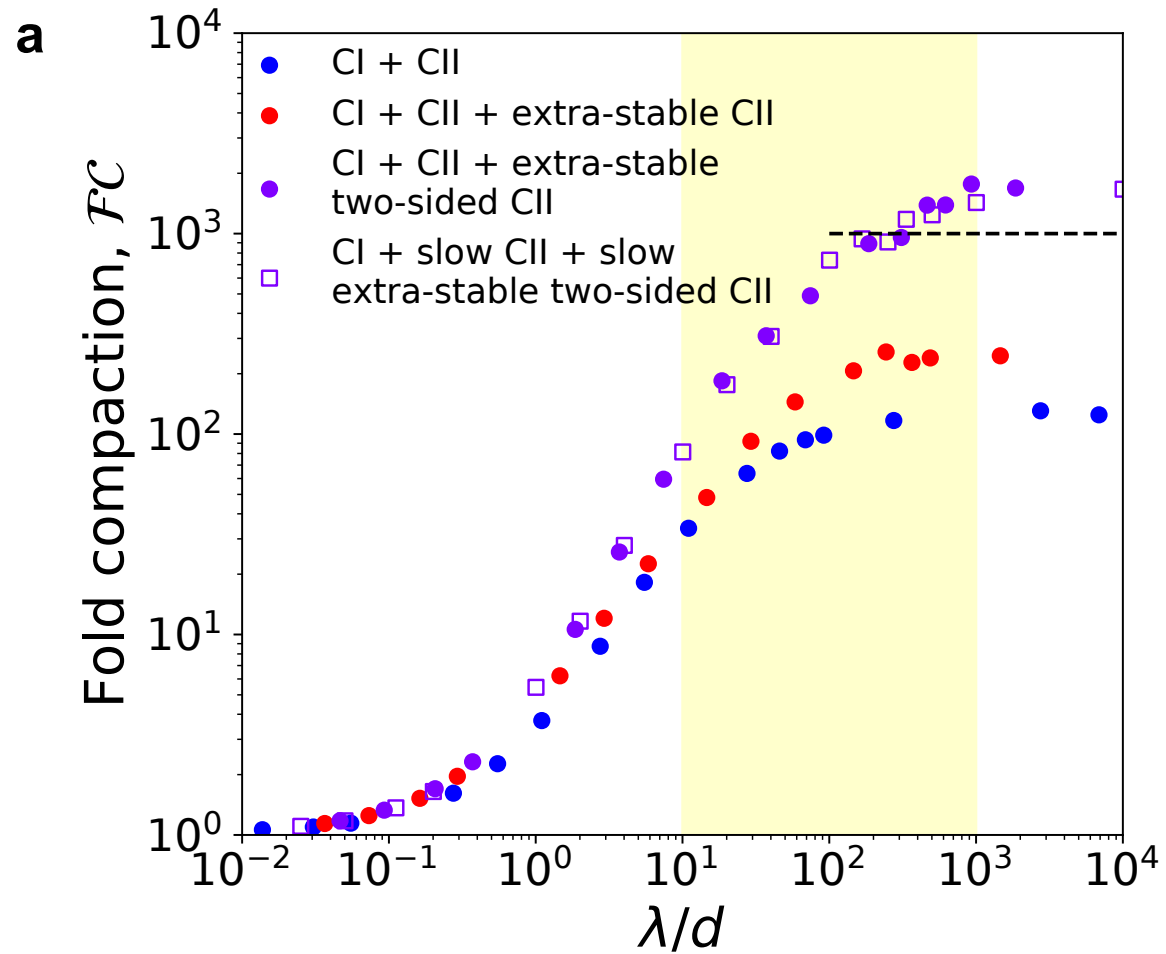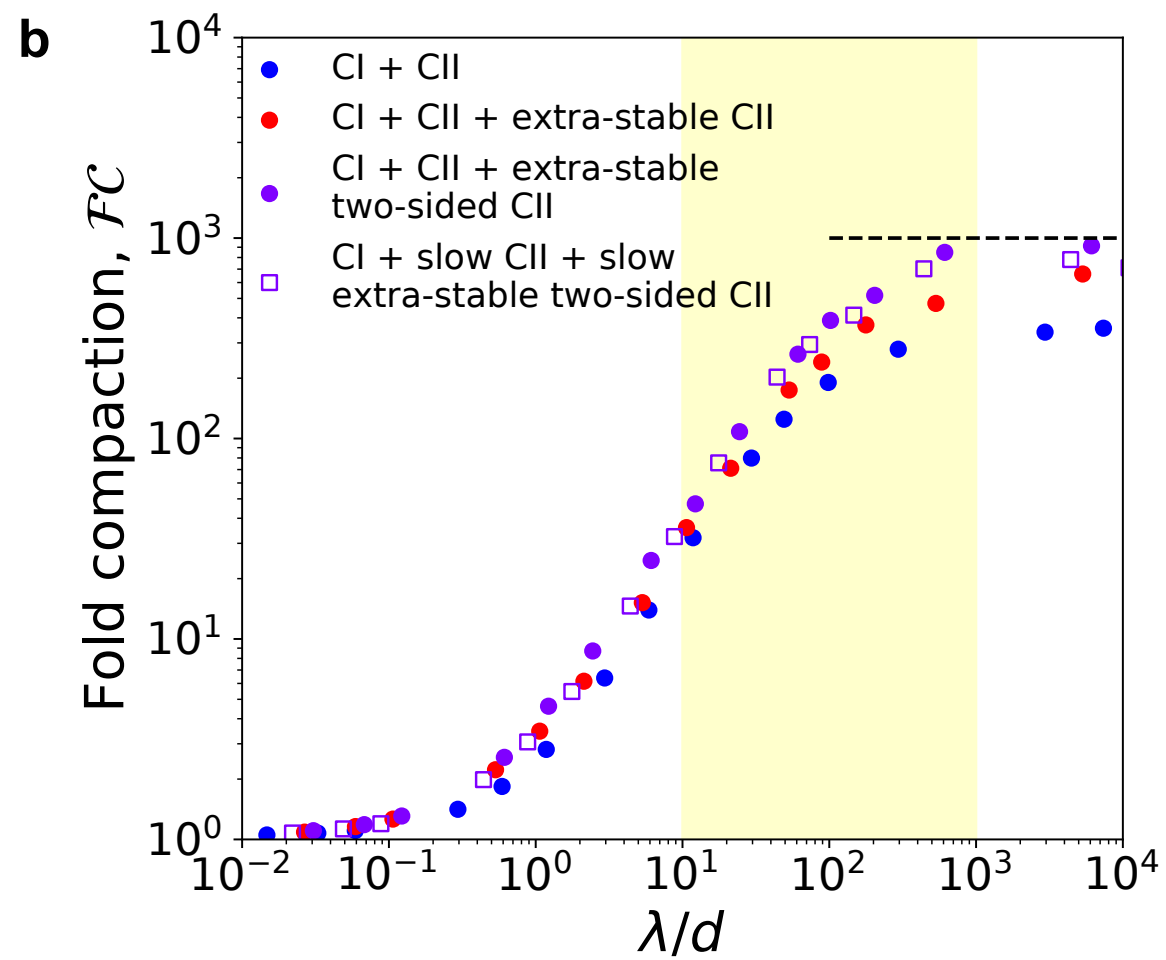

Supplement: supp [file elife_poa_e63528_Figure_3_figure_supplement_2.pdf › elife_poa_e63528_Figure_3_figure_supplement_2.pdf]
